# Supplementary material for: Benzothiazole derivatives with varied π-conjugation: synthesis, tunable solid-state emission, and application in single-component LEDs
Source: Royal Society of Chemistry journal article supplement (doi:10.1039/d2tc00440b), 2022-01-01
Supplement: d2tc00440b1.pdf [file d2tc00440b1.pdf]

**Benzothiazole derivatives with varied  $\pi$ -conjugation:  
Synthesis, tunable solid-state emission, and application in  
single-component LEDs**

Yuwei Song, Lai Hu, Qian Cheng, Zhiyuan Chen, Huan Su, Hao Liu, Rui Liu\*,  
Senqiang Zhu\* and Hongjun Zhu

School of Chemistry and Molecular Engineering, Nanjing Tech University, Nanjing  
211816, China

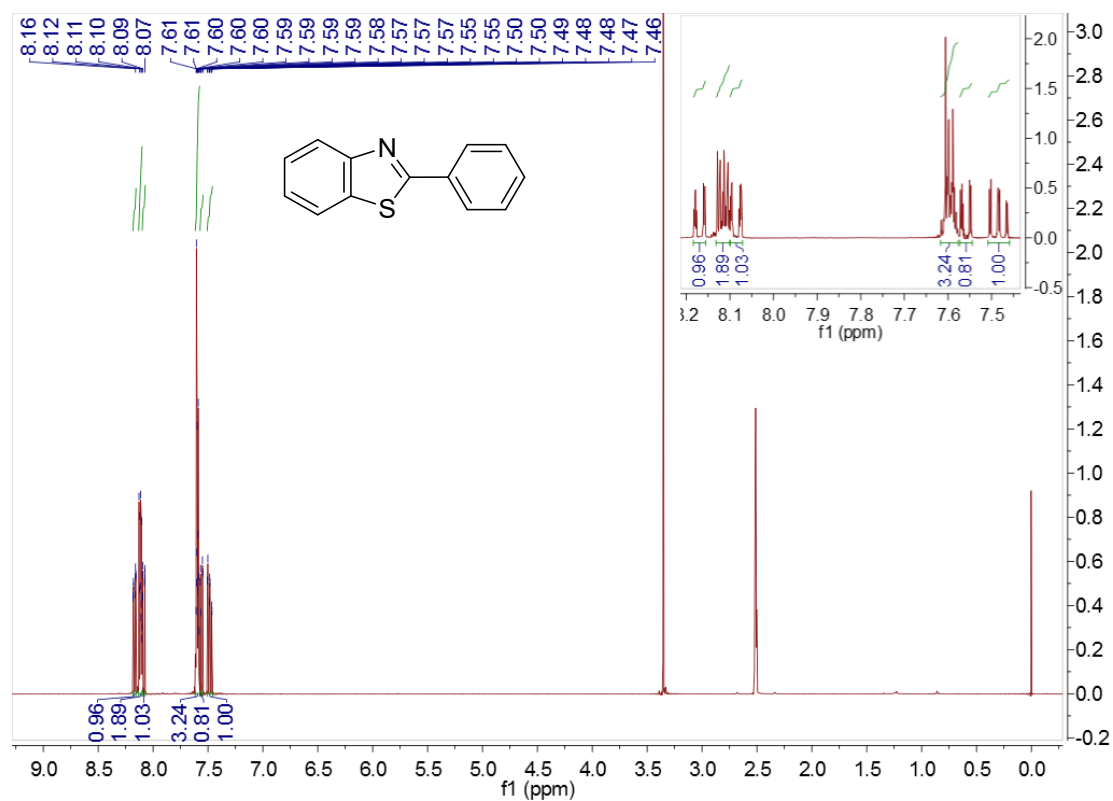

Figure S1.  $^1\text{H}$  NMR spectrum of ATZ1 (400 MHz,  $\text{DMSO-d}_6$ )

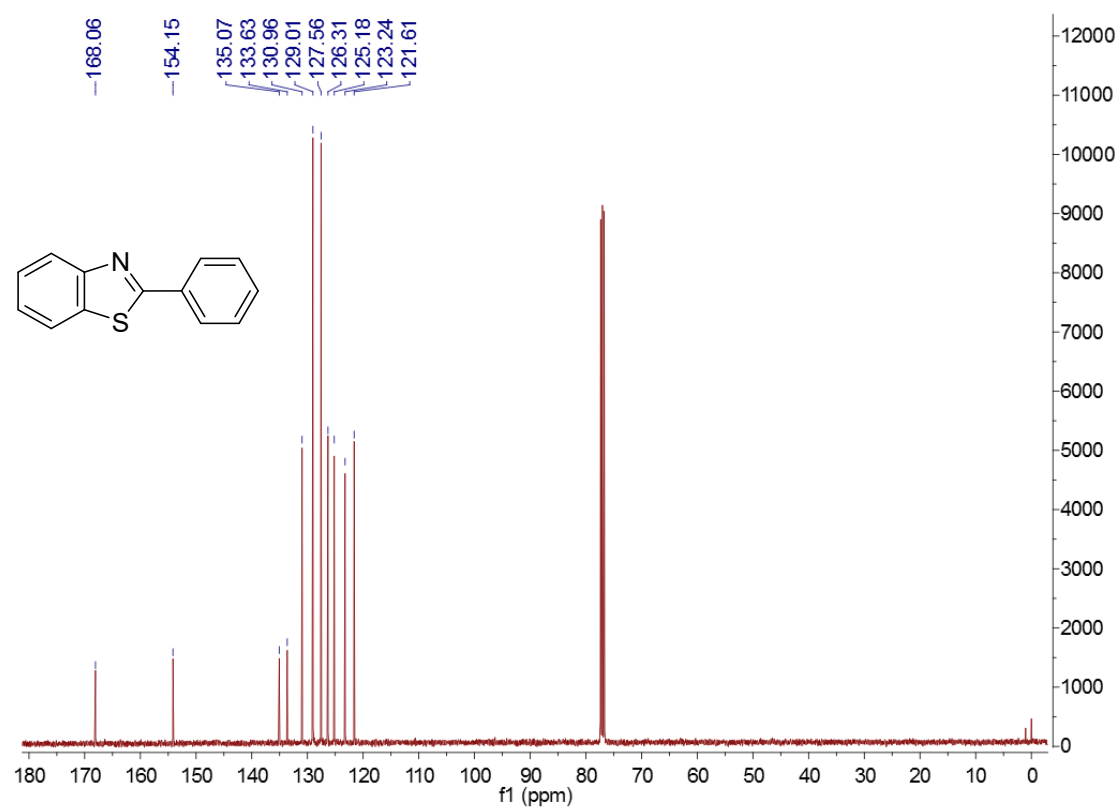

Figure S2.  $^{13}\text{C}$  NMR spectrum of ATZ1 (400 MHz,  $\text{CDCl}_3$ )

1-8 #22 RT: 0.12 AV: 1 NL: 3.61E9  
T: FTMS + p ESI Full lock ms [80.0000-1200.0000]

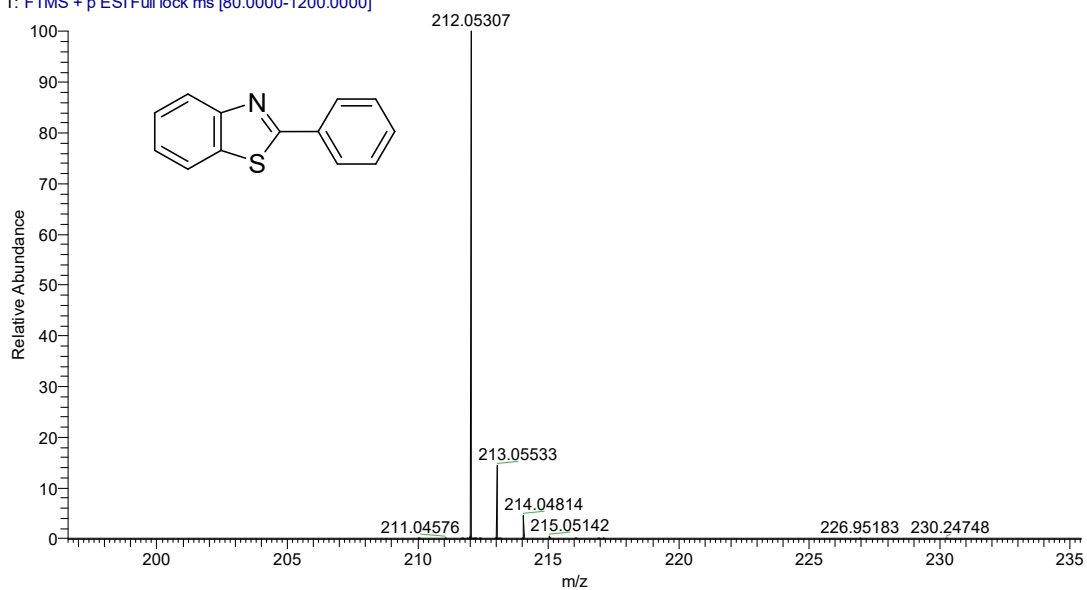

Figure S3. Mass spectrum of ATZ1

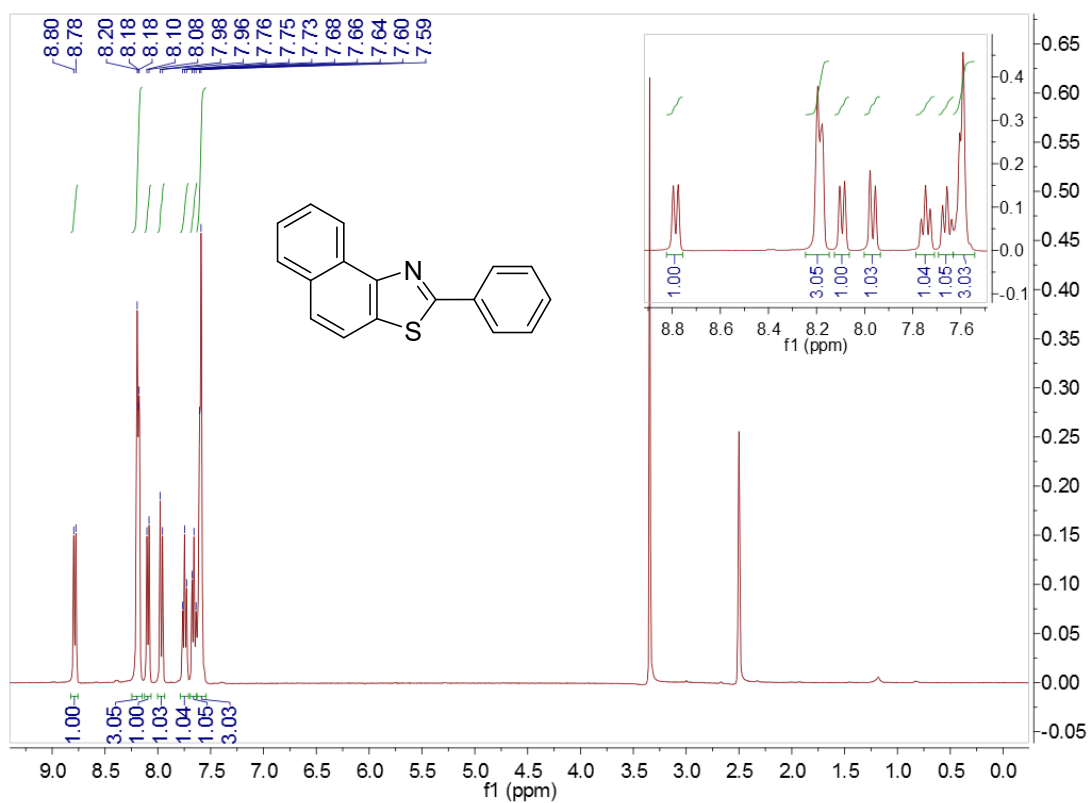

Figure S4. <sup>1</sup>H NMR spectrum of ATZ2 (400 MHz, DMSO-d<sub>6</sub>)

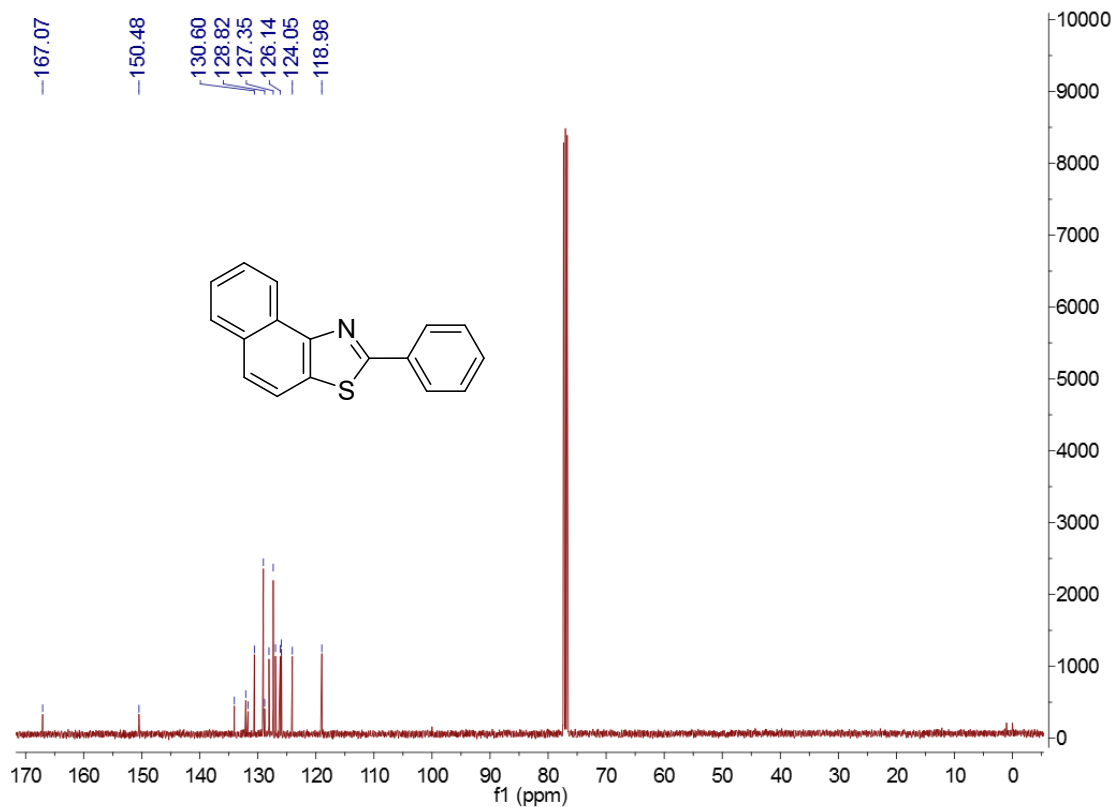

**Figure S5.**  $^{13}\text{C}$  NMR spectrum of ATZ2 (400 MHz,  $\text{CDCl}_3$ )

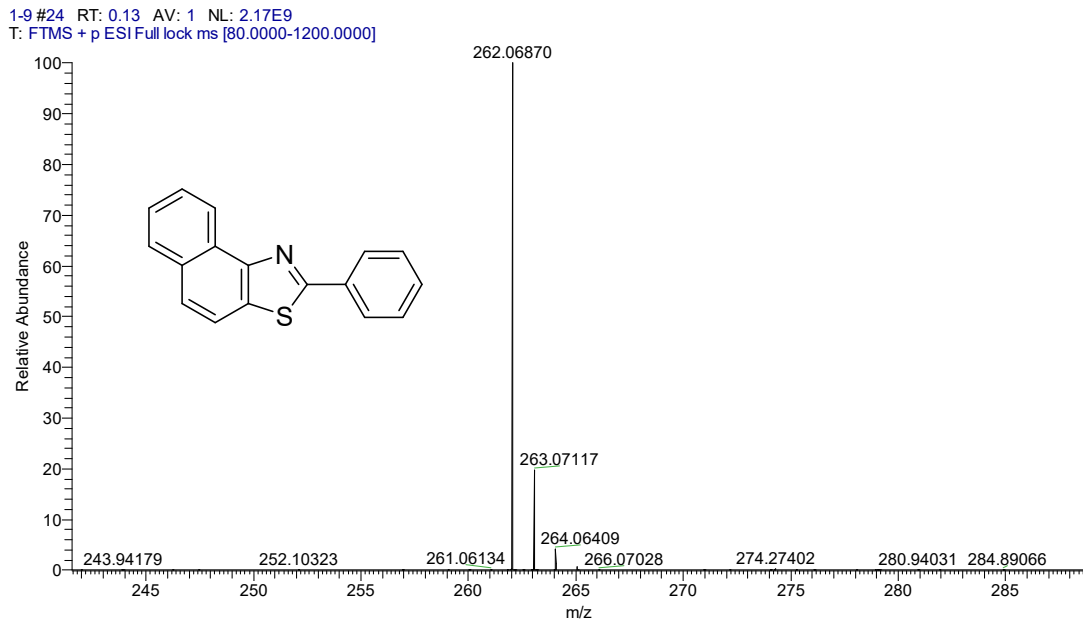

**Figure S6.** Mass spectrum of ATZ2

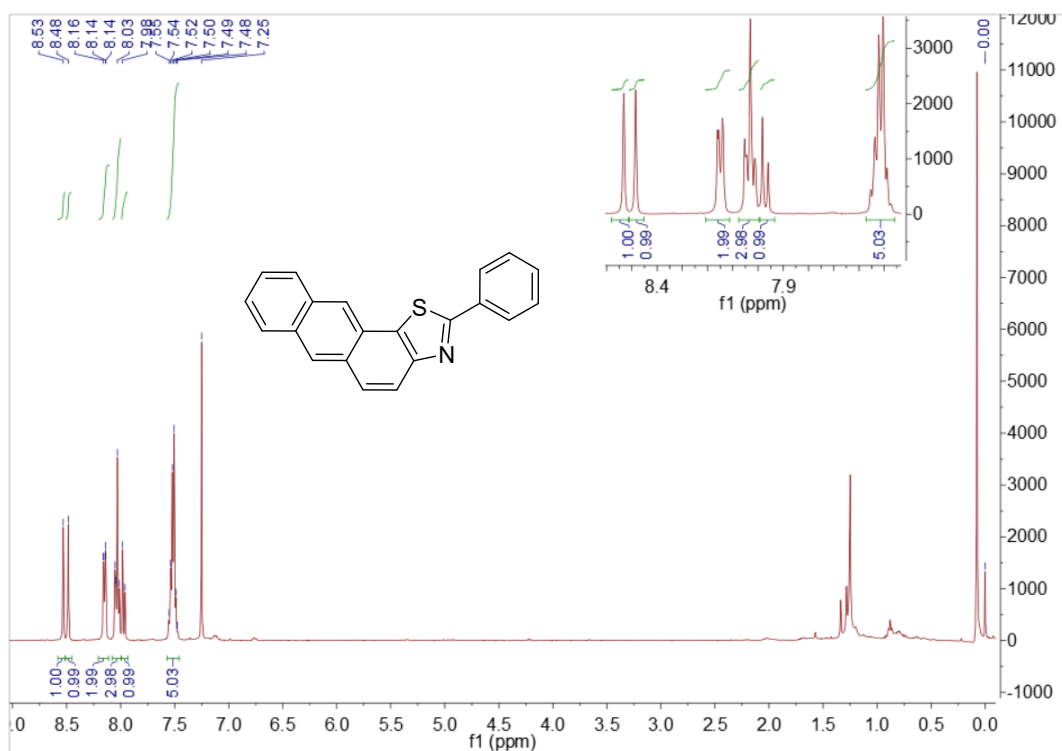

**Figure S7.  $^1\text{H}$  NMR spectrum of ATZ3 (400 MHz,  $\text{CDCl}_3$ )**

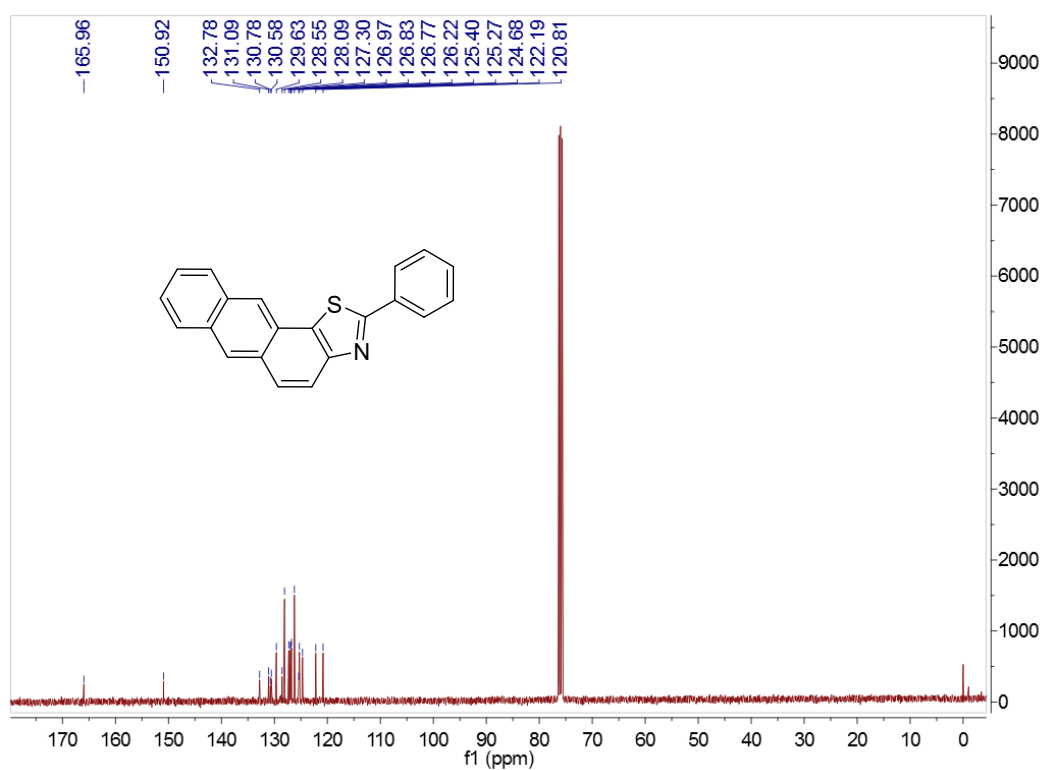

**Figure S8.  $^{13}\text{C}$  NMR spectrum of ATZ3 (400 MHz,  $\text{CDCl}_3$ )**

1-10 #26 RT: 0.14 AV: 1 NL: 2.80E8  
T: FTMS + p ESI Full lock ms [80.0000-1200.0000]

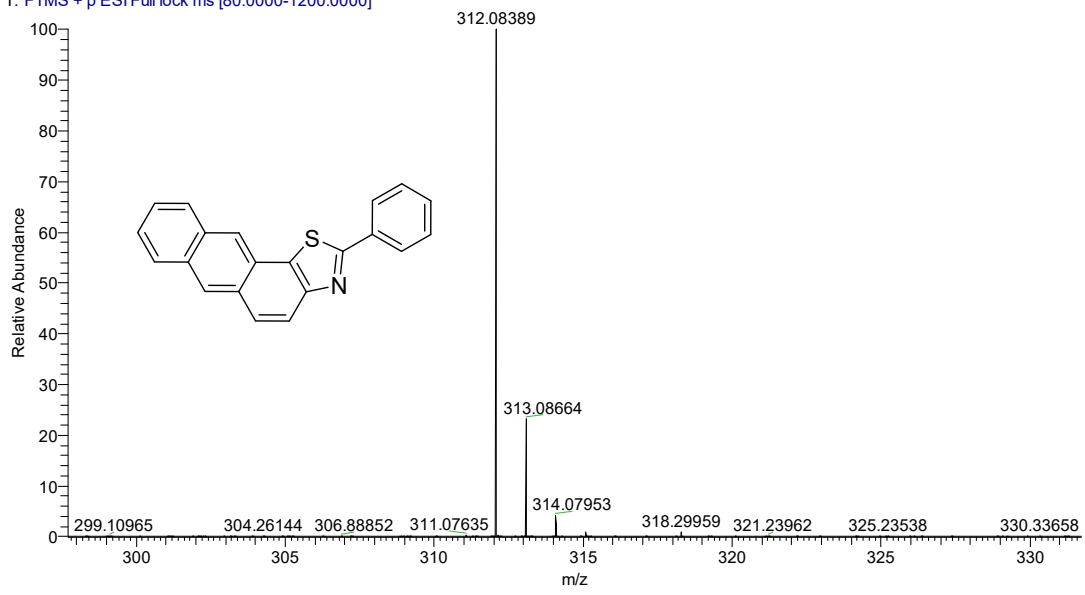

Figure S9. Mass spectrum of ATZ3

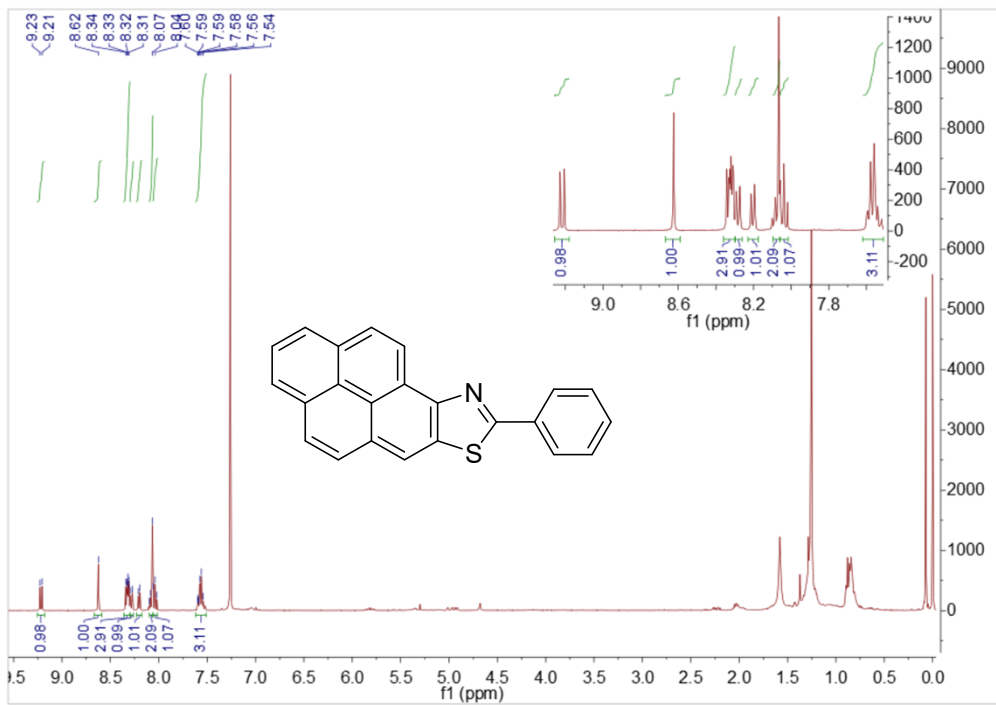

Figure S10. <sup>1</sup>H NMR spectrum of ATZ4 (400 MHz, CDCl<sub>3</sub>)

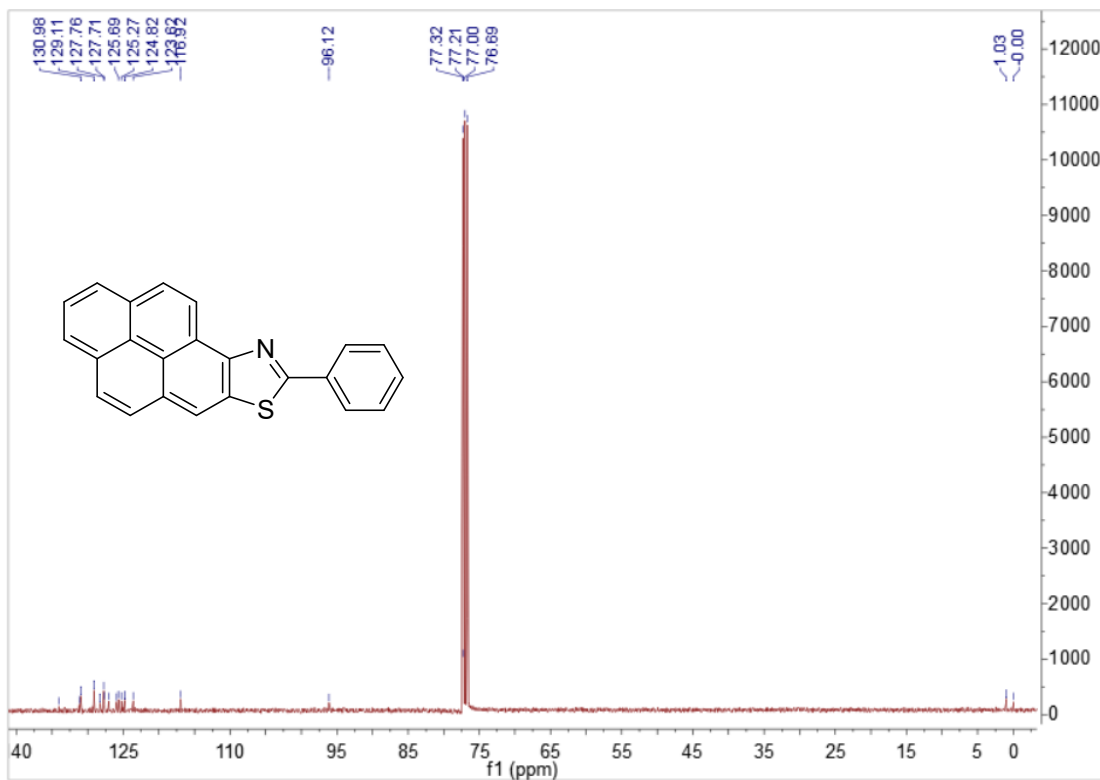

Figure S11.  $^{13}\text{C}$  NMR spectrum of ATZ4 (400 MHz,  $\text{CDCl}_3$ )

1-11 #23 RT: 0.13 AV: 1 NL: 4.42E7  
 T: FTMS + p ESI Full lock ms [80.0000-1200.0000]

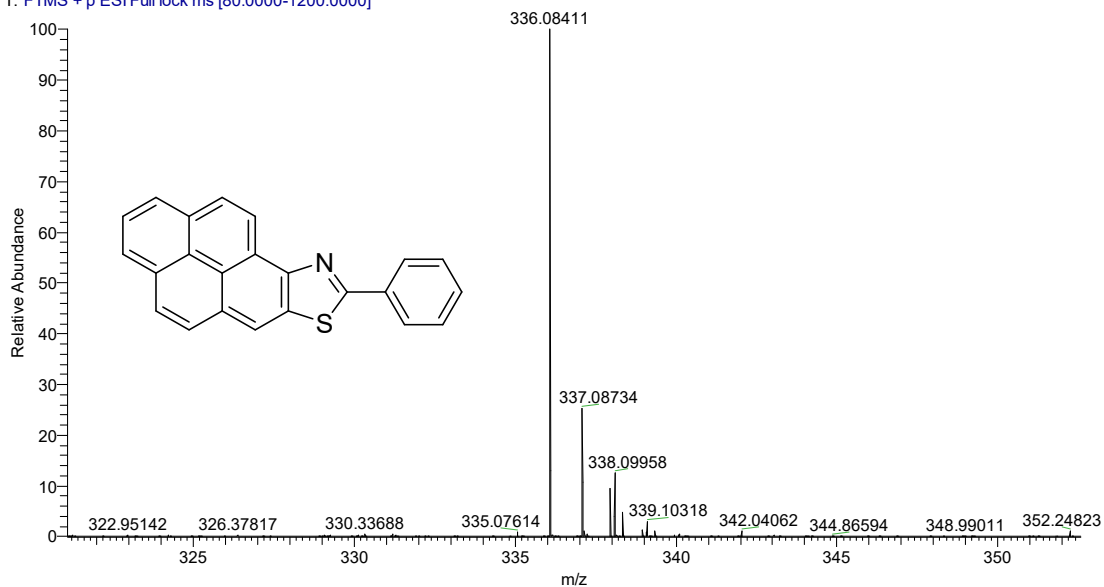

Figure S12. Mass spectrum of ATZ4

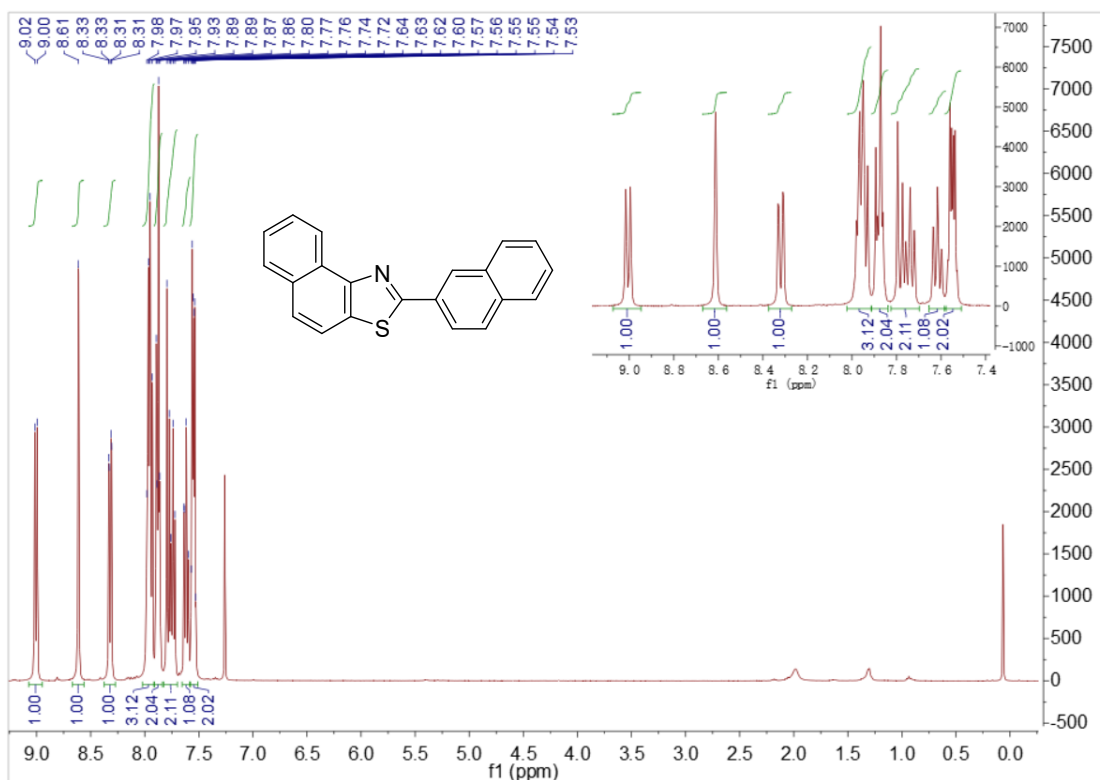

Figure S13.  $^1\text{H}$  NMR spectrum of ATZ5 (400 MHz,  $\text{CDCl}_3$ )

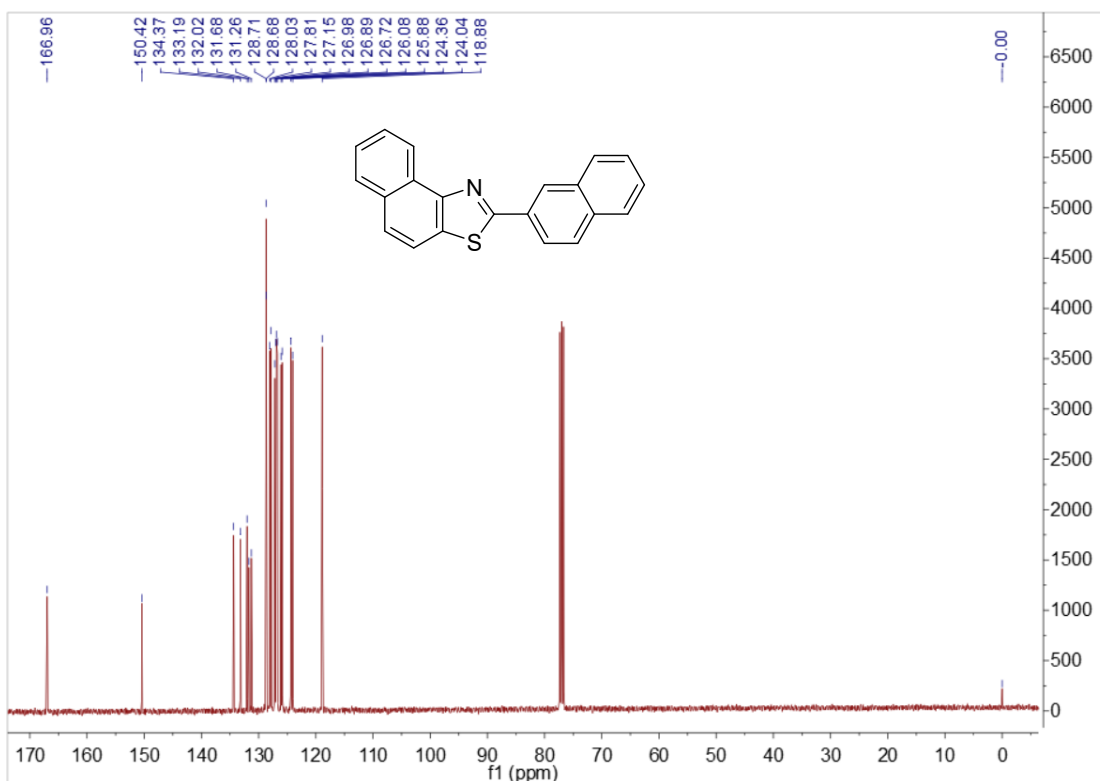

Figure S14.  $^{13}\text{C}$  NMR spectrum of ATZ5 (400 MHz,  $\text{CDCl}_3$ )



1-12 #23 RT: 0.13 AV: 1 NL: 1.14E9  
T: FTMS + p ESI Full lock ms [80.0000-1200.0000]

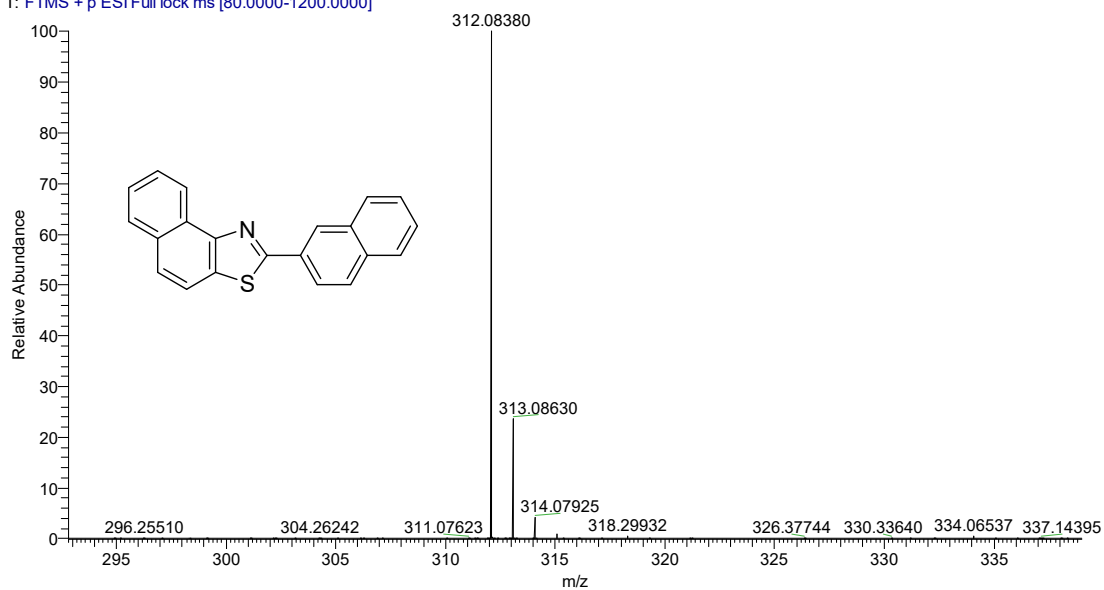

Figure S15. Mass spectrum of ATZ5

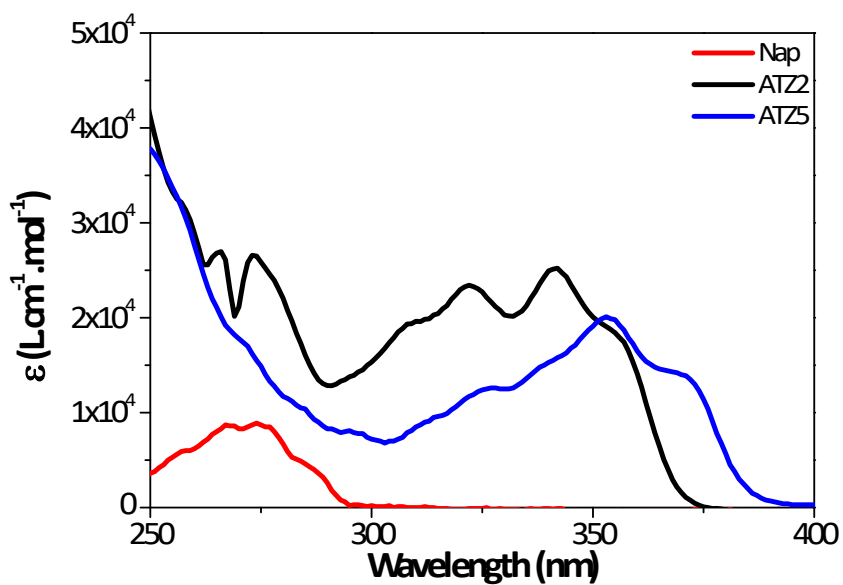

Figure S16. The UV-vis absorption spectra of ATZ2, ATZ5, and naphthalene in dichloromethane solution ( $1 \times 10^{-5} \text{ mol L}^{-1}$ ) measured at room temperature.

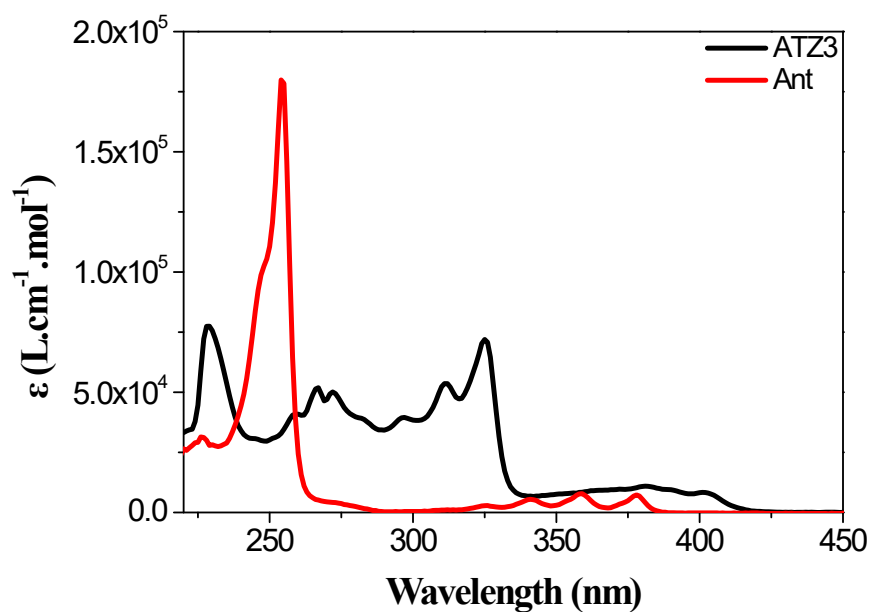

**Figure S17.** The UV-vis absorption spectra of **ATZ3** and anthracene in dichloromethane solution ( $1 \times 10^{-5}$  mol L $^{-1}$ ) measured at room temperature.

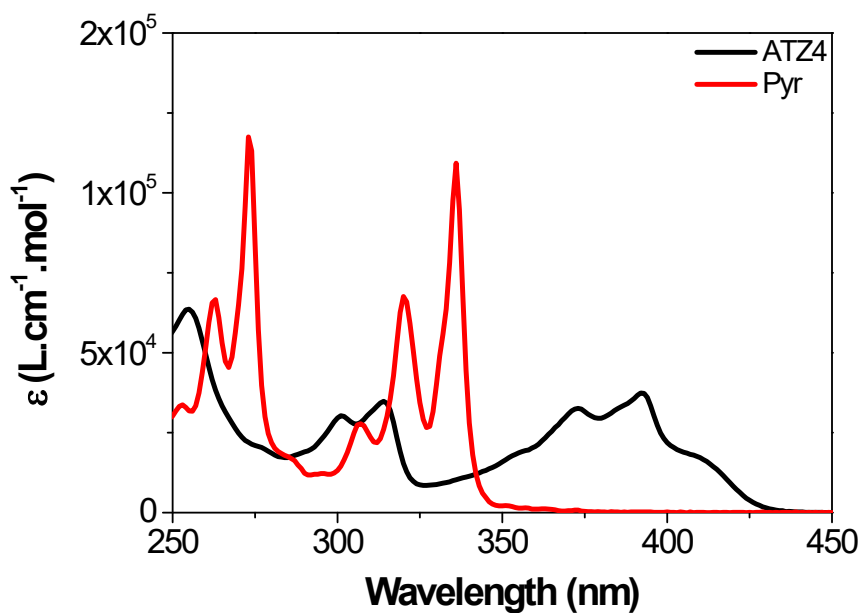

**Figure S18.** The UV-vis absorption spectra of **ATZ4** and pyrene in dichloromethane solution ( $1 \times 10^{-5}$  mol L $^{-1}$ ) measured at room temperature.

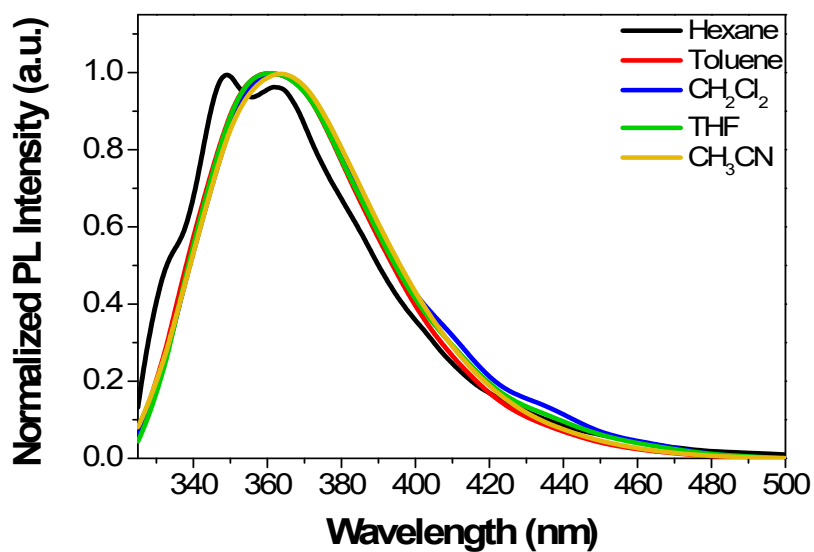

Figure S19. Photoluminescence spectra of ATZ1 in different polar solvents

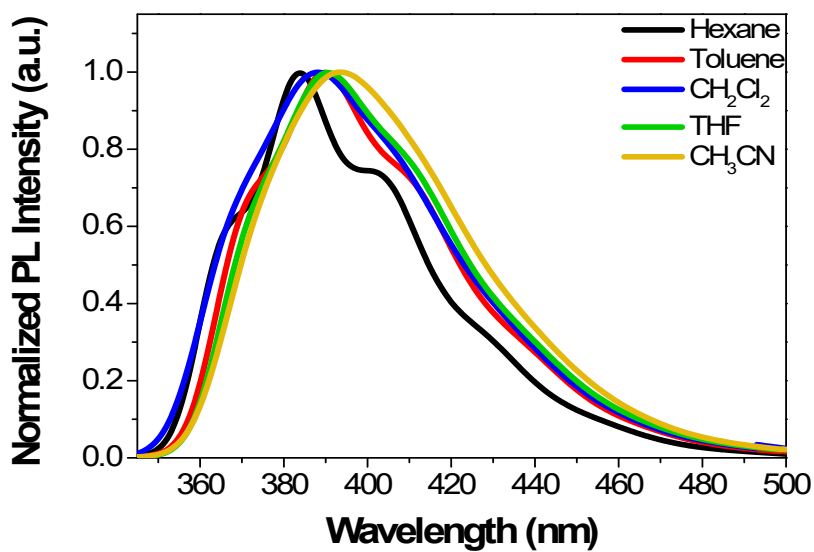

Figure S20. Photoluminescence spectra of ATZ2 in different polar solvents

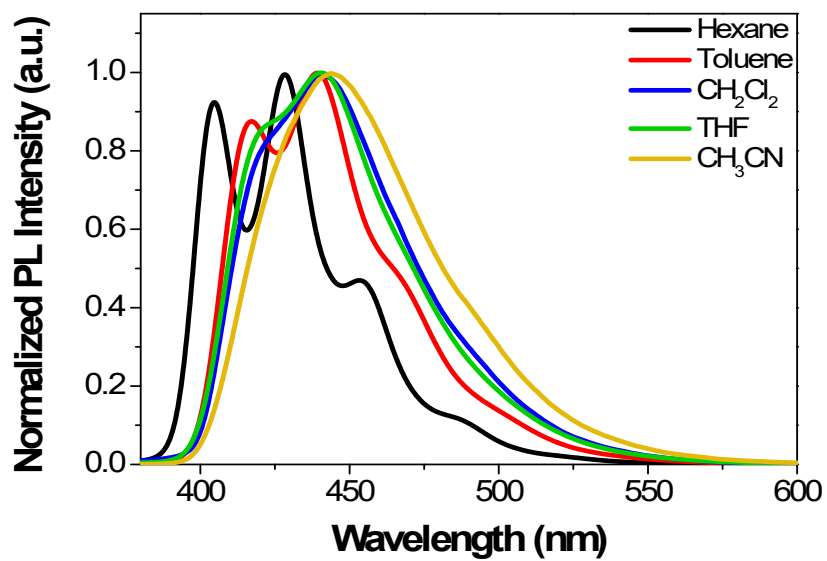

Figure S21. Photoluminescence spectra of ATZ3 in different polar solvents

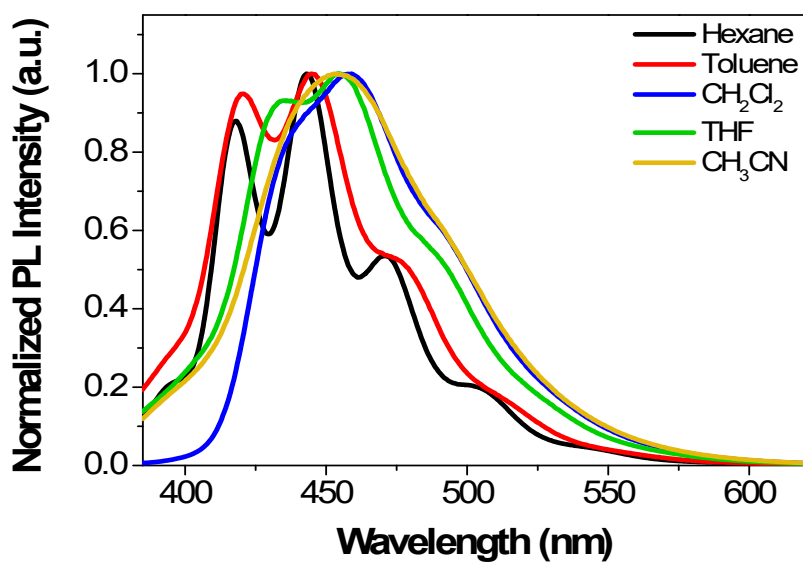

Figure S22. Photoluminescence spectra of ATZ4 in different polar solvents

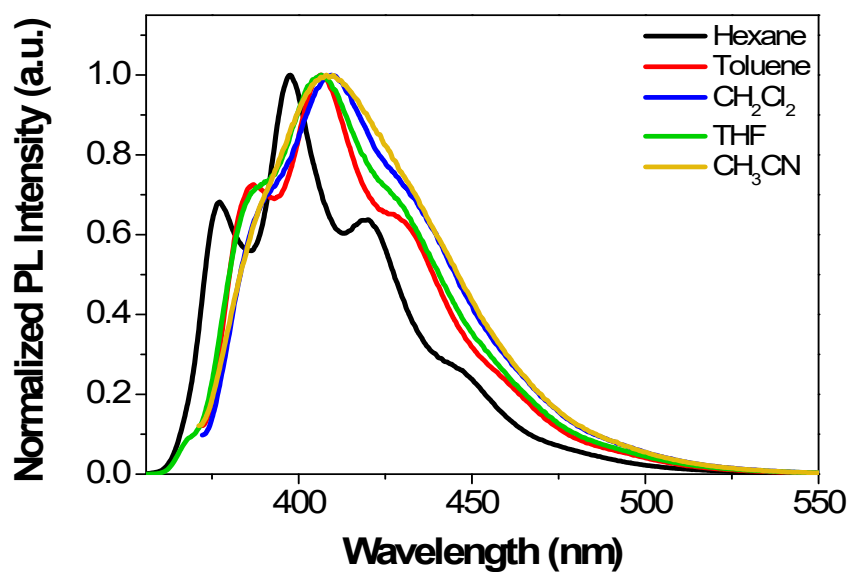

Figure S23. Photoluminescence spectra of ATZ5 in different polar solvents

Table S1. Relative fluorescence quantum yield of ATZ1~ATZ5 in different polar solvents

|      | Hexane | Toluene | CH <sub>2</sub> Cl <sub>2</sub> | THF   | ACN   |
|------|--------|---------|---------------------------------|-------|-------|
| ATZ1 | 0.035  | 0.019   | 0.027                           | 0.019 | 0.017 |
| ATZ2 | 0.204  | 0.213   | 0.194                           | 0.122 | 0.188 |
| ATZ3 | 0.247  | 0.261   | 0.210                           | 0.110 | 0.175 |
| ATZ4 | 0.284  | 0.311   | 0.247                           | 0.321 | 0.169 |
| ATZ5 | 0.264  | 0.249   | 0.192                           | 0.230 | 0.138 |

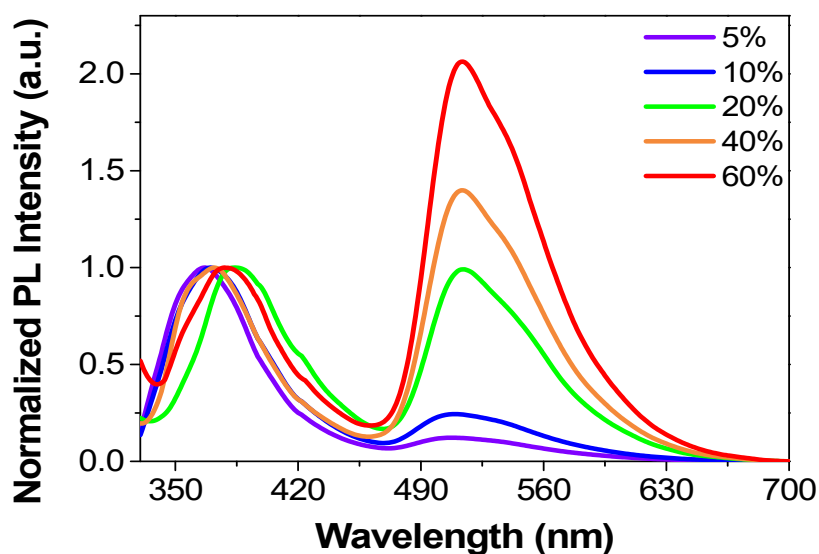

Figure S24. Photoluminescence spectra of the thin films prepared by doping different proportions of ATZ1 in PMMA.

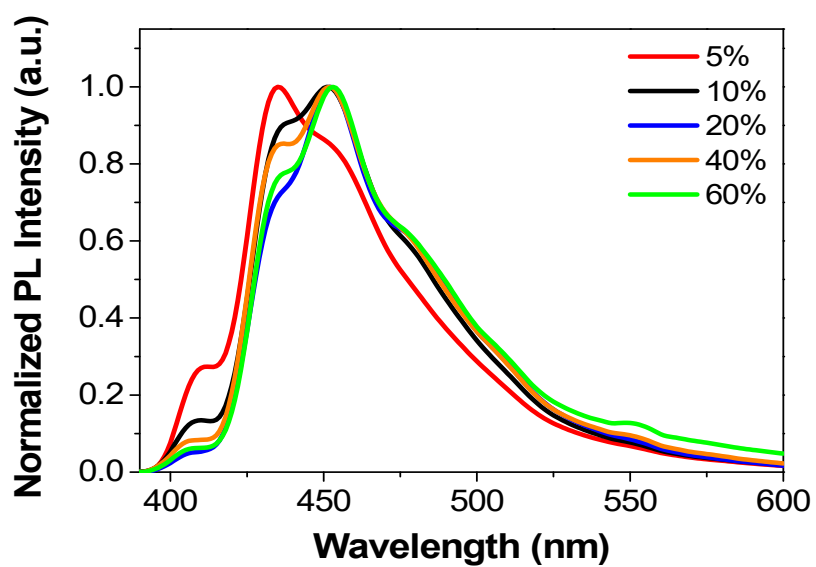

Figure S25. Photoluminescence spectra of the thin films prepared by doping different proportions of ATZ3 in PMMA.

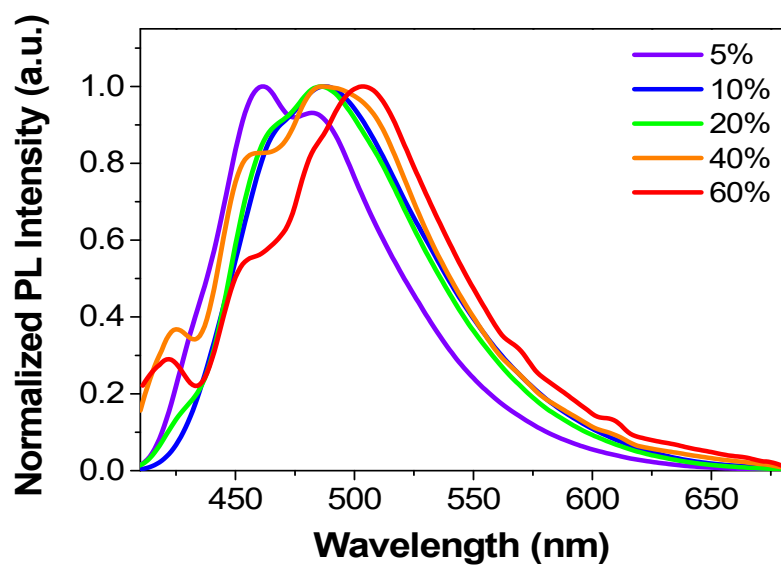

Figure S26. Photoluminescence spectra of the thin films prepared by doping different proportions of ATZ4 in PMMA.

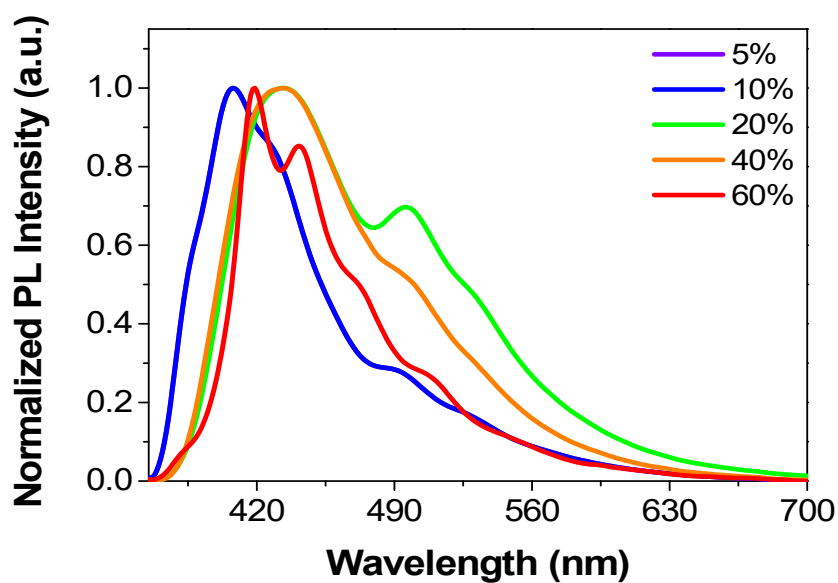

**Figure S27.** Photoluminescence spectra of the thin films prepared by doping different proportions of ATZ5 in PMMA.

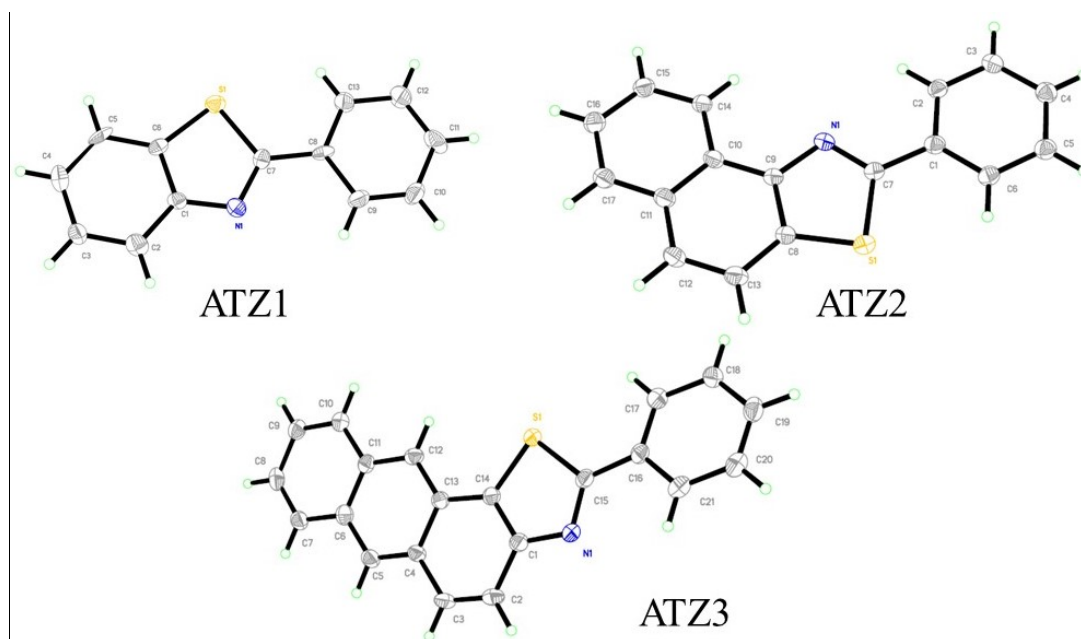

**Figure S28.** Crystal structure of ATZ1, ATZ2, and ATZ3.

**Table S2.** Crystallographic data of ATZ1, ATZ2, and ATZ3.

|                | ATZ1                              | ATZ2                               | ATZ3                               |
|----------------|-----------------------------------|------------------------------------|------------------------------------|
| formula        | C <sub>13</sub> H <sub>9</sub> NS | C <sub>17</sub> H <sub>11</sub> NS | C <sub>21</sub> H <sub>13</sub> NS |
| Formula weight | 211.27                            | 261.33                             | 311.38                             |
| Crystal system | orthorhombic                      | monoclinic                         | monoclinic                         |
| Space group    | P n a 2 <sub>1</sub>              | P 2 <sub>1</sub> /m                | P 2 <sub>1</sub> /n                |
| a, Å           | 16.1420(19)                       | 11.7214(6)                         | 4.0231(3)                          |

|                                            |                     |                     |                     |
|--------------------------------------------|---------------------|---------------------|---------------------|
| <i>b</i> , Å                               | 11.0866(14)         | 3.8718(2)           | 28.291(2)           |
| <i>c</i> , Å                               | 5.7979(8)           | 13.6211(8)          | 12.8877(10)         |
| <i>α</i> , deg                             | 90                  | 90                  | 90                  |
| <i>β</i> , deg                             | 90                  | 94.355(3)           | 91.515(4)           |
| <i>γ</i> , deg                             | 90                  | 90                  | 90                  |
| <i>V</i> , Å <sup>3</sup>                  | 1037.6(2)           | 616.38(6)           | 1466.35(19)         |
| <i>Z</i>                                   | 4                   | 2                   | 4                   |
| $\rho_{\text{calcd}}$ , g cm <sup>-3</sup> | 1.352               | 1.408               | 1.410               |
| <i>T</i> / K                               | 296(2)              | 193(2)              | 193(2)              |
| $\mu$ , mm <sup>-1</sup>                   | 0.272               | 1.422               | 1.258               |
| $\theta$                                   | 2.229-28.457        | 2.83-48.85          | 2.718 - 52.991      |
| F (000)                                    | 440                 | 272                 | 648                 |
| Index ranges                               | -21 ≤ <i>h</i> ≤ 15 | -13 ≤ <i>h</i> ≤ 13 | -4 ≤ <i>h</i> ≤ 4   |
|                                            | -14 ≤ <i>k</i> ≤ 14 | 0 ≤ <i>k</i> ≤ 4    | -33 ≤ <i>k</i> ≤ 33 |
|                                            | -7 ≤ <i>l</i> ≤ 7   | 0 ≤ <i>l</i> ≤ 16   | -12 ≤ <i>l</i> ≤ 15 |
| Data / restraints / parameters             | 2552//22/248        | 1261/1317/285       | 2560/0/208          |
| GOF ( <i>F</i> <sup>2</sup> )              | 1.079               | 1.056               | 1.095               |
| <i>R</i> , <i>wR</i>                       | 0.0650, 0.1433      | 0.0553, 0.1388      | 0.0850, 0.2343      |

**Table S3.** Properties of single-component white light emitting materials based on small organic molecules.

| Compound    | Molecular weight | $\Phi$ (%) | CIE (x, y)        | CRI       | CCT (K)     | Ref.             |
|-------------|------------------|------------|-------------------|-----------|-------------|------------------|
| 3           | 820              | 0.9        | 0.30, 0.43        | 56        |             | 1                |
| TIM         | 153              | 11.8       | 0.33, 0.35        | 85        | 5669        | 2                |
| 1           | 189              | 2          | 0.31, 0.35        | 83        | 6218        | 3                |
| TPO-Br      | 454              |            | 0.31, 0.33        |           |             | 4                |
| PTZ-Ph-TTR  | 477              | 11         | 0.33, 0.33        | 92        |             | 5                |
| 2PQ-PTZ     | 479              |            | 0.32, 0.34        | 89        | 5850        | 6                |
| rac-BINAP   | 622              | 7.6        | 0.37, 0.44        | 73        |             | 7                |
| CTM         | 453              |            | 0.35, 0.35        | 88.8      |             | 8                |
| D1c         | 356              | 32         | 0.34, 0.36        |           |             | 9                |
| Cz9PhAn     | 600              | 47         | 0.30, 0.33        | 75.6      |             | 10               |
| 2           | 293              | 16         | 0.31, 0.34        |           |             | 11               |
| OPC         | 544              | 23         | 0.35, 0.35        |           |             | 12               |
| PTZ-BP      | 379              | 8          | 0.28, 0.30        |           |             | 13               |
| DPPZ        | 280              | 1          | 0.28, 0.33        |           |             | 14               |
| CIBDBT      | 322              | 7.2        | 0.33, 0.35        |           |             | 15               |
| ImBr        | 369              | 4.1        | 0.29, 0.35        |           |             | 16               |
| 3-DPH-XO    | 363              | 40         | 0.27, 0.35        |           |             | 17               |
| SDB2t       | 582              | 13         | 0.27, 0.27        |           |             | 18               |
| P3          | 310              | 36         | 0.28, 0.31        |           |             | 19               |
| <b>ATZ2</b> | <b>262</b>       | <b>4.8</b> | <b>0.28, 0.34</b> | <b>73</b> | <b>8401</b> | <b>This work</b> |



## References

- [1] G. Baryshnikov, P. Gawrys, K. Ivaniuk, B. Witulski, R. J. Whitby, A. Al-Muhammad, B. Minaev, V. Cherpak, P. Stakhira, D. Volyniuk, G. Wiosna-Salyga, B. Luszczynska, A. Lazauskas, S. Tamulevicius and J. V. Grazulzvičius, *J. Mater. Chem. C*, 2016, **4**, 5795.
- [2] X. Zheng, Y. Huang, D. Xiao, S. Yang, Z. Lin and Q. Ling, *Mater. Chem. Front.*, 2021, **5**, 6960-6968
- [3] N. Zhang, C. Sun, X. Jiang, X. Xing, Y. Yan, L. Cai, M. Wang and G. Guo, *Chem. Commun.*, 2017, **53**, 9269-9272.
- [4] J. Wang, X. Gu, H. Ma, Q. Peng, X. Huang, X. Zheng, S. Sung, G. Shan, J. Lam, Z. Shuai and B. Tang, *Nat. Commun.*, 2018, **9**, 2963.
- [5] K. Wang, Y. Shi, C. Zheng, W. Liu, K. Liang, X. Li, M. Zhang, H. Lin, S. Tao, C. Lee, X. Ou and X. Zhang, *ACS Appl. Mater. Interfaces*, 2018, **10**, 31515-31525.
- [6] B. Li, Z. Li, F. Guo, J. Song, X. Jiang, Y. Wang, S. Gao, J. Wang, X. Pang, L. Zhao and Y. Zhang, *ACS Appl. Mater. Interfaces*, 2020, **12**, 14233-14243.
- [7] X. Wu, C. Huang, D. Chen, D. Liu, C. Wu, K. Chou, B. Zhang, Y. Wang, Y. Liu, E. Li, W. Zhu and P. Chou, *Nat. Commun.*, 2020, **11**, 2145.
- [8] J. Tan, W. Chen, S. Ni, Z. Qiu, Y. Zhan, Z. Yang, J. Xiong, C. Cao, Y. Huo and C. Lee, *J. Mater. Chem. C*, 2020, **8**, 8061-8068.
- [9] Q. Yang and J. Lehn, *Angew. Chem. Int. Ed. Engl.*, 2014, **53**, 4572-4577.
- [10] Y. Chen, K. Tang, Y. Chen, J. Shen, Y. Wu, S. Liu, C. Lee, C. Chen, T. Lai, S. Tung, R. Jeng, W. Hung, M. Jiao, C. Wu and P. Chou, *Chem. Sci.*, 2016, **7**, 3556-3563.
- [11] H. Liu, X. Cheng, H. Zhang, Y. Wang, H. Zhang and S. Yamaguchi, *Chem. Commun.*, 2017, **53**, 7832-7835.
- [12] Z. Xie, C. Chen, S. Xu, J. Li, Y. Zhang, S. Liu, J. Xu and Z. Chi, *Angew. Chem. Int. Ed. Engl.*, 2015, **54**, 7181-7184.
- [13] C. Li, J. Liang, B. Liang, Z. Li, Z. Cheng, G. Yang and Y. Wang, *Adv. Opt. Mater.*, 2019, **7**, 1801667.
- [14] C. Zhou, S. Zhang, Y. Gao, H. Liu, T. Shan, X. Liang, B. Yang and Y. Ma, *Adv. Funct. Mater.*, 2018, **28**, 1802407.
- [15] Z. He, W. Zhao, J. Lam, Q. Peng, H. Ma, G. Liang, Z. Shuai and B. Tang, *Nat. Commun.*, 2017, **8**, 416.
- [16] J. Li, J. Zhou, Z. Mao, Z. Xie, Z. Yang, B. Xu, C. Liu, X. Chen, D. Ren, H. Pan, G. Shi, Y. Zhang and Z. Chi, *Angew. Chem. Int. Ed. Engl.*, 2018, **57**, 6449-6453.
- [17] Y. Zhang, Y. Miao, X. Song, Y. Gao, Z. Zhang, K. Ye and Y. Wang, *J. Phys. Chem. Lett.*, 2017, **8**, 4808-4813.
- [18] B. Xu, H. Wu, J. Chen, Z. Yang, Z. Yang, Y. Wu, Y. Zhang, C. Jin, P. Lu, Z. Chi, S. Liu, J. Xu and M. Aldred, *Chem. Sci.*, 2017, **8**, 1909-1914.
- [19] X. Ma, L. Jia, B. Yang, J. Li, W. Huang, D. Wu and W. Wong, *J. Mater. Chem. C*, 2021, **9**, 727-735.

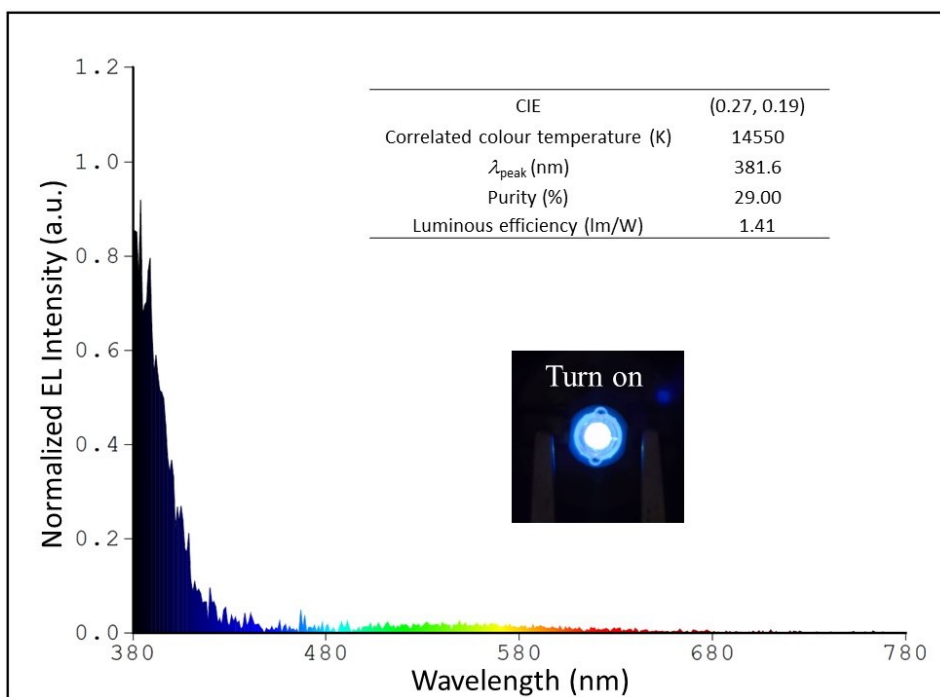

**Figure S29.** Electroluminescent spectra, energized photo (inset) and the electroluminescent data (inset) of commercial UV LED.

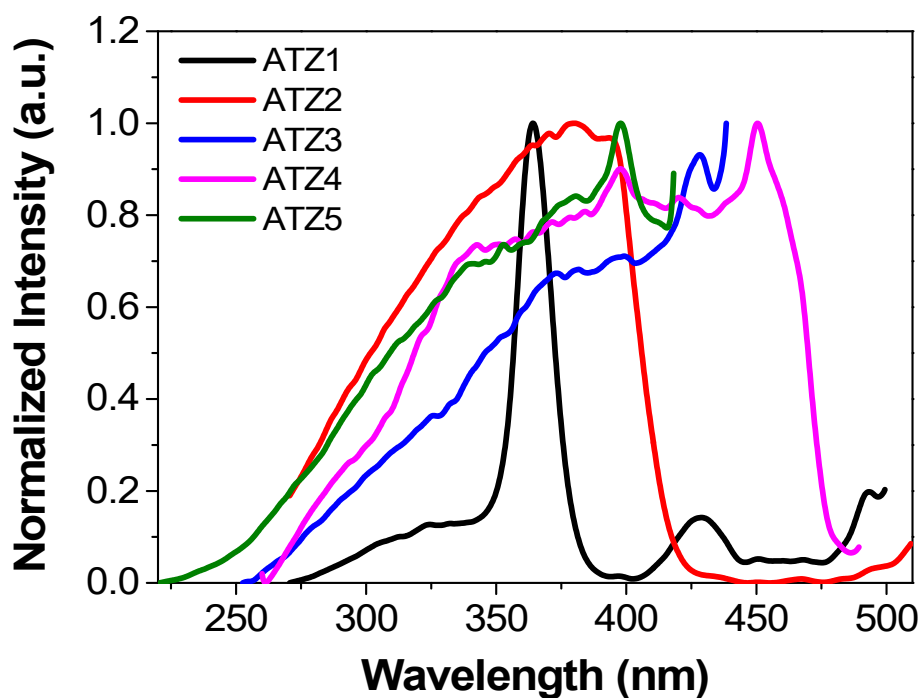

**Figure S30.** Normalized excitation spectra of ATZ1~ATZ5. ATZ1:  $\lambda_{\text{em}} = 520$  nm, ATZ2:  $\lambda_{\text{em}} = 526$  nm, ATZ3:  $\lambda_{\text{em}} = 455$  nm, ATZ4:  $\lambda_{\text{em}} = 505$  nm, ATZ5:  $\lambda_{\text{em}} = 428$  nm.
